# Supplementary material for: A mycorrhizae-like gene regulates stem cell and gametophore development in mosses
Source: PubMed Central journal article supplement (PMC7181705; doi:10.1038/s41467-020-15967-6), 2020-04-24
Supplement: 41467_2020_15967_MOESM1_ESM.pdf [file 41467_2020_15967_MOESM1_ESM.pdf]

**Supplementary Information**

**for**

**A mycorrhizae-like gene regulates stem cell and gametophore development in mosses**

**Wang et al.**

| Taxonomy                                    | Number of hits | Number of Organisms | Description                                                      |
|---------------------------------------------|----------------|---------------------|------------------------------------------------------------------|
| root                                        | 7927           | 1856                |                                                                  |
| cellular organisms                          | 7916           | 1848                |                                                                  |
| Eukaryota                                   | 552            | 336                 |                                                                  |
| Phycomitrella patens                        | 3              | 1                   | <a href="#">Phycomitrella patens hits</a>                        |
| Opisthokonta                                | 547            | 334                 |                                                                  |
| Fungi                                       | 515            | 316                 |                                                                  |
| Fungi incertae sedis                        | 19             | 10                  |                                                                  |
| Mucoromycota                                | 17             | 8                   |                                                                  |
| Zoopagomycota                               | 2              | 2                   |                                                                  |
| Dikarya                                     | 496            | 306                 |                                                                  |
| Agaricomycotina                             | 107            | 53                  |                                                                  |
| saccharomyceta                              | 389            | 253                 |                                                                  |
| Metazoa                                     | 32             | 18                  |                                                                  |
| Eumetazoa                                   | 30             | 17                  |                                                                  |
| Bilateria                                   | 19             | 11                  |                                                                  |
| Anthozoa                                    | 11             | 6                   |                                                                  |
| Amphimedon queenslandica                    | 2              | 1                   | <a href="#">Amphimedon queenslandica hits</a>                    |
| Planoprotostelium fungivorum                | 2              | 1                   | <a href="#">Planoprotostelium fungivorum hits</a>                |
| Bacteria                                    | 1              | 1507                | <a href="#">Bacteria hits</a>                                    |
| Terrabacteria_group                         | 462            | 285                 |                                                                  |
| Cyanobacteria/Melainabacteria_group         | 116            | 73                  |                                                                  |
| Cyanobacteria                               | 115            | 72                  |                                                                  |
| Candidatus Melainabacteria bacterium        | 1              | 1                   | <a href="#">Candidatus Melainabacteria bacterium hits</a>        |
| Chloroflexi                                 | 14             | 10                  |                                                                  |
| Firmicutes                                  | 58             | 39                  |                                                                  |
| Deinococcus                                 | 15             | 9                   |                                                                  |
| Actinobacteria                              | 255            | 153                 |                                                                  |
| Capsulimonas corticalis                     | 4              | 1                   | <a href="#">Capsulimonas corticalis hits</a>                     |
| Bacteroidetes/Chlorobi_group                | 94             | 49                  |                                                                  |
| Bacteroidetes                               | 88             | 48                  |                                                                  |
| bacterium 336/3                             | 6              | 1                   | <a href="#">bacterium 336/3 hits</a>                             |
| Proteobacteria                              | 6668           | 1111                |                                                                  |
| Gammaproteobacteria                         | 6556           | 1047                |                                                                  |
| delta/epsilon subdivisions                  | 75             | 41                  |                                                                  |
| Alphaproteobacteria                         | 30             | 21                  |                                                                  |
| Burkholderiaceae                            | 7              | 2                   |                                                                  |
| PVC_group                                   | 122            | 52                  |                                                                  |
| Planctomycetes                              | 112            | 45                  |                                                                  |
| Verrucomicrobia                             | 9              | 6                   |                                                                  |
| Candidatus Abyssubacteria bacterium SURF_17 | 1              | 1                   | <a href="#">Candidatus Abyssubacteria bacterium SURF_17 hits</a> |
| uncultured bacterium                        | 2              | 1                   | <a href="#">uncultured bacterium hits</a>                        |
| Treponema                                   | 4              | 4                   |                                                                  |
| Treponema saccharophilum                    | 1              | 2                   | <a href="#">Treponema saccharophilum hits</a>                    |
| Treponema primitia                          | 1              | 2                   | <a href="#">Treponema primitia hits</a>                          |
| Chloracidobacterium sp. CP2_5A              | 1              | 1                   | <a href="#">Chloracidobacterium sp. CP2_5A hits</a>              |
| unclassified_Bacteria                       | 4              | 3                   |                                                                  |
| bacterium                                   | 2              | 1                   | <a href="#">bacterium hits</a>                                   |
| Parcubacteria_group                         | 2              | 2                   |                                                                  |
| Archaea                                     | 6              | 5                   |                                                                  |
| Candidatus Woesearchaeota archaeon          | 1              | 1                   | <a href="#">Candidatus Woesearchaeota archaeon hits</a>          |
| Candidatus Lokiarchaeota archaeon           | 1              | 1                   | <a href="#">Candidatus Lokiarchaeota archaeon hits</a>           |
| Methanobacteriales                          | 4              | 3                   |                                                                  |
| Methanothermus                              | 2              | 2                   |                                                                  |
| Methanothermobacter tenebrarum              | 2              | 1                   | <a href="#">Methanothermobacter tenebrarum hits</a>              |
| Viruses                                     | 11             | 8                   |                                                                  |
| Phage Gifsy-1                               | 1              | 1                   | <a href="#">Phage Gifsy-1 hits</a>                               |
| Myoviridae                                  | 8              | 5                   |                                                                  |
| unclassified_Peduovirus                     | 2              | 2                   |                                                                  |
| Pseudomonas phage Noxifer                   | 2              | 1                   | <a href="#">Pseudomonas phage Noxifer hits</a>                   |
| Pseudomonas phage PhiPA3                    | 2              | 1                   | <a href="#">Pseudomonas phage PhiPA3 hits</a>                    |
| Ralstonia phage phiRSL1                     | 2              | 1                   | <a href="#">Ralstonia phage phiRSL1 hits</a>                     |
| Marseillevirus LCMAC201                     | 1              | 1                   | <a href="#">Marseillevirus LCMAC201 hits</a>                     |
| Catovirus CTV1                              | 1              | 1                   | <a href="#">Catovirus CTV1 hits</a>                              |

**Supplementary Fig. 1.** Taxonomic distribution of hits generated from BLASTP search of NCBI non-redundant (nr) protein sequence database. PpMACRO2 (accession number: XP\_024388278) was used as query and E-value cutoff=1e-6.

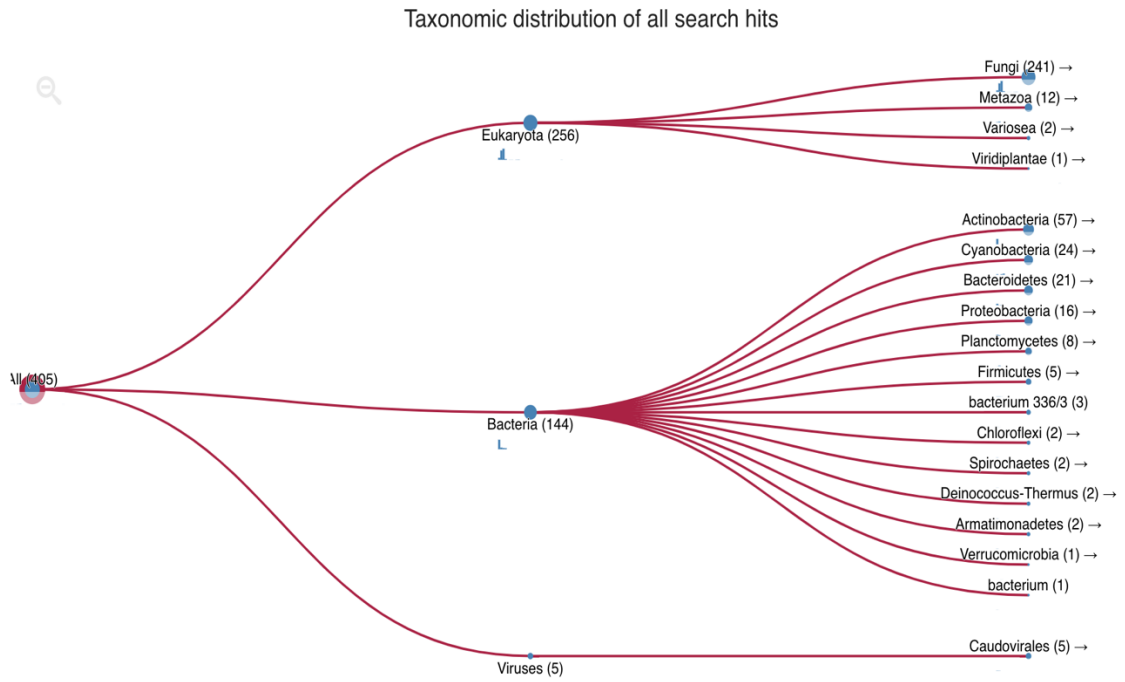

**Supplementary Fig. 2.** Taxonomic distribution of hits generated from pHMMER search of Reference Proteomes. PpMACRO2 (NCBI accession number: XP\_024388278) was used as query and E-value cutoff=1e-6.

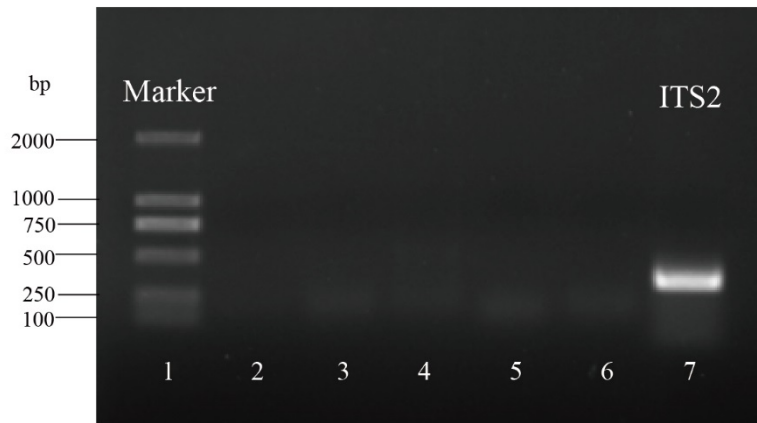

**Supplementary Fig. 3.** Genomic PCR for *PpMACRO2* homologs in the charophyte alga *Spirogyra* *sp.* Internal Transcribed Spacer 2 (ITS2) could be amplified from *Spirogyra* *sp.*, and the fragment length of genomic PCR is in accordance with expectation. Subsequent sequencing result confirmed that this species belongs to the genus *Spirogyra*. However, no sequence could be amplified, using two pairs of primers designed from *S. pratensis* hits obtained from NCBI ESTs (lanes 2-3) and three pairs of primers designed from various other green algal hits (lanes 4-6). This evidence, combined with the absence of *PpMACRO2* homologs from any complete green algal genome generated from axenic cultures, suggests that the green algal hits from OneKP and NCBI ESTs might be due to contamination.

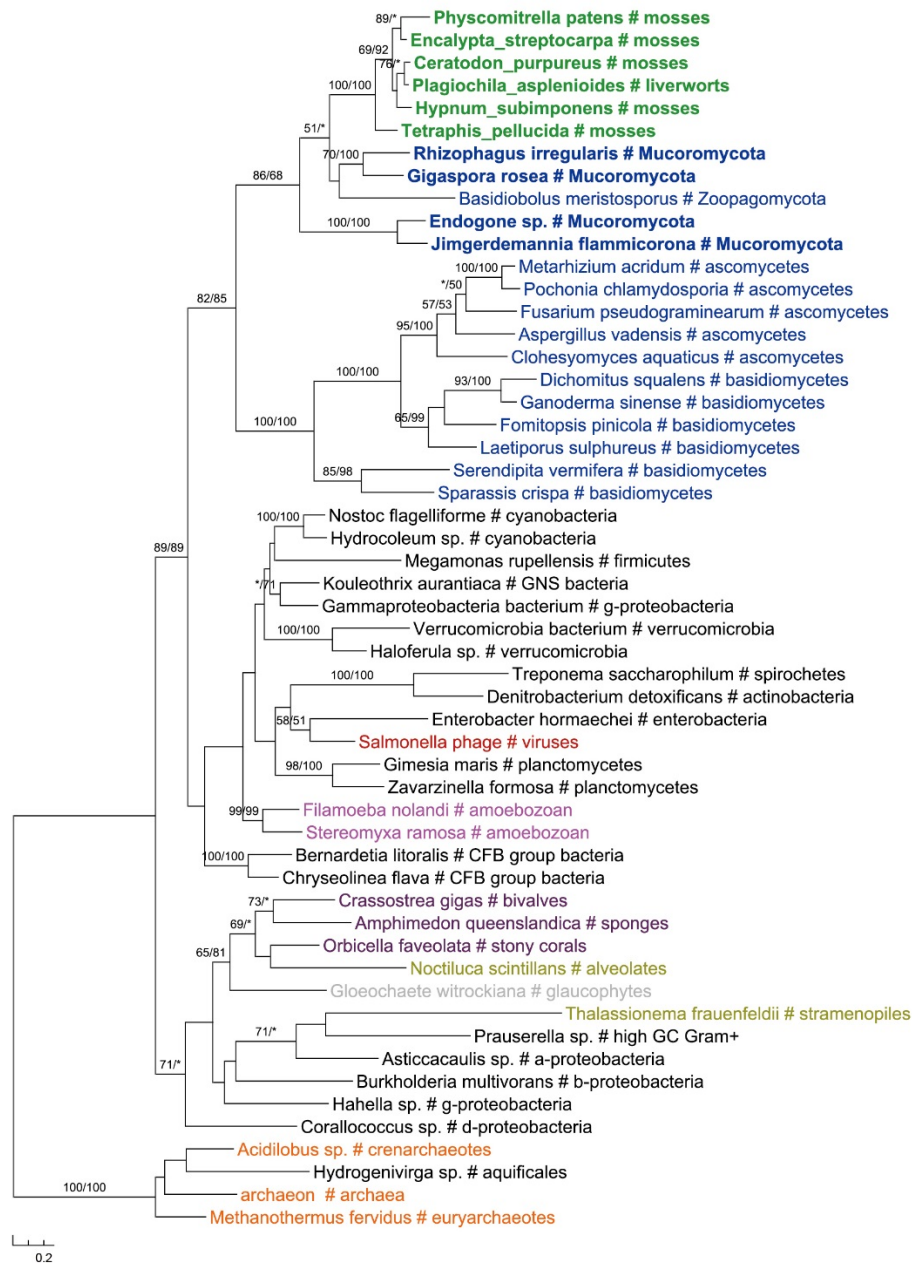

**Supplementary Fig. 4.** Relationships of PpMACRO2 and homologs. Numbers above branches show bootstrap support values from maximum likelihood and distance analyses, respectively. Asterisks show values lower than 50%. Data do not include green algal sequences of which the identity cannot be confirmed. Please see **Supplementary Fig. 5** for gene tree that includes green algal sequences.

**a**

```

Phycomitrella KYG--GVARLVPIVRSALVDEMCQQNV--GTCVLVDT--QRLLQGANHG--NVPYVIAVYPMRVFELLPPDDDIAYCTNAL
Hyppnum -----GAKLVVPIVRSALVDEMCQQNV--GTCVLVDA--QRLLQAAQGB--QTKNVPYVIAVYPMRVFVLLHPDDDIAYCTNAL
Plagioclila -----VPIVRAAVVDEMCQQNV--GTCVLVDA--QRLLQSAQGB--QAKNVPYVIAVYPMRVFVLLHPDDDIAYCTNAL
Tetraphis KVMG--GPNLIVTYQALREKCGQNP--GTCVLVDT--RLLATKARQGB--VYRNVPYVIAVYPMRVFVLLHPDDDIAYCTNAL
Rhizophagus EVMG--GWNLPVQKIEIKKCGQNP--GTCMLVDT--RNLIKQLPSEK-----NYPVLAHCPTMRTFALDECDDIYCTNAL
Jingerdemannia DVMG--GADLIVPVQRLKADMSQQNP--GTCVTVTL--GDLVSGSTFRA--AGQVYVYVLIHPMLRPHHIDSPDLTYCQWAT
Gigaspora EVMG--GPNLIVTYQALREKCGQNP--GTCVLVDT--RLLATKARQGB--VYRNVPYVIAVYPMRVFVLLHPDDDIAYCTNAL
Coleochaete QYFG--GVKLVPMVQKALDEFCQQPV--GSSFTIRT--DRSAG-----CRVIAHTPMRIPDVI--AMPDIAYCMNSM
Chaetopeltis RVFG--GYSFVPMVQKALDEFCQQPV--GSCPLVHT--GRTEG-----CRVIAHTPMRIPDVI--AMPDIAYCMNSM
Fomitopsis QLTFPGBSEFPVQKALDEFCQQPV--GTCVTLPI--AOTPCANR-----FKCFYALCPTMRTFQVYVNDREYVYCTNSL
Ganoderma DYIAPESDNDALTHAAQVLYQRNRGYAPP--GTCVLVPL--VYTFCEHNU-----LGVRYVALCPTMRTFENYVKNREYVYVYVNSL
Aspergillus RAFSPTDYLALTRHQGLFRDYGVLFP--GSCVLIPI--PBEFDRSKNV-----WQZYVALCPTMRTFQVYVNDREYVYVYCTNSL
Pochonia RAFSPTDYLALTRHQGLFRDYGVLFP--GSCVLIPI--PBEFDRSKNV-----WQZYVALCPTMRTFQVYVNDREYVYVYCTNSL
Nostoc RFGG-----HSLMARVQRILLELYGQPV--GTSNIVET--DHYKH-----PFLAHTPMRVFMI--AGDIPYVAMWAK
Kouleothrix RFGG-----SNLERVQKRLIAPVIGQPV--GTSFVYAT--NHLRH-----PFLAHTPMRVFMI--AGDIPYVAMWAK
Gimnesia HRFQ-----VELMQRILORILLDETLGQPI--GTSVLEPT--GNSDY-----PVLASPTMRFVSI--SOTDNYVATWAS
Verrucomicrobia KRFQ-----PELQKTRORILLDETLGQPV--GTAIVYPT--GNSKH-----PVLASPTMRFVSI--SOTDNYVATWAS
Bernardetia NVFG-----MTVQVYVQKRIKRFYVQGPV--GTSIVYPT--ENEFH-----PFLAHTPMRVFMI--AGDIPYVAMWAK
Salmonella AVFG-----PQLQSRVQNTLREYLGQPV--GTAIVYPT--GNSKH-----PVLASPTMRFVSI--SOTDNYVATWAS
Treponema AVFG-----DALIRVYQKRIKRFYVQGPV--GTSIVYPT--ENEFH-----PFLAHTPMRVFMI--AGDIPYVAMWAK
Pantibacillus KYFG-----NQLMERVQKRIKRFYVQGPV--GTSIVYPT--ENEFH-----PFLAHTPMRVFMI--AGDIPYVAMWAK
Dentrobacterium SYFG-----BOLKHAVQRILLDETLGQPV--GTSNIVET--DHYKH-----PFLAHTPMRVFMI--AGDIPYVAMWAK
Orbicella HRFQ-----WQKQRELQANTLREYLGQPV--GTAIVYPT--GNSKH-----PVLASPTMRFVSI--SOTDNYVATWAS
Gloeochaete ERFQ-----WQLQRLQAKLEEFDEGLLV--GQALITET--GDTREDESRI-----PVLASPTMRFVSI--SOTDNYVATWAS
Coralloccoccus DTLG-----LQVQAVQKRIKRFYVQGPV--GTAIVYPT--GNSKH-----PVLASPTMRFVSI--SOTDNYVATWAS
Acidilobus HRFQ-----WQKQRELQANTLREYLGQPV--GTAIVYPT--GNSKH-----PVLASPTMRFVSI--SOTDNYVATWAS
Methanothermus NRGQ-----KTEKEMASKAPIDIGAYSTPA--GKLRK-----RYVIAHTPMRIPDVI--AMPDIAYCMNSM
Noctiluca KRFG-----HQLQVQLQERTIRREYLGQPV--GQALITET--GDDPI-----RYVIAHTPMRIPDVI--AMPDIAYCMNSM

```

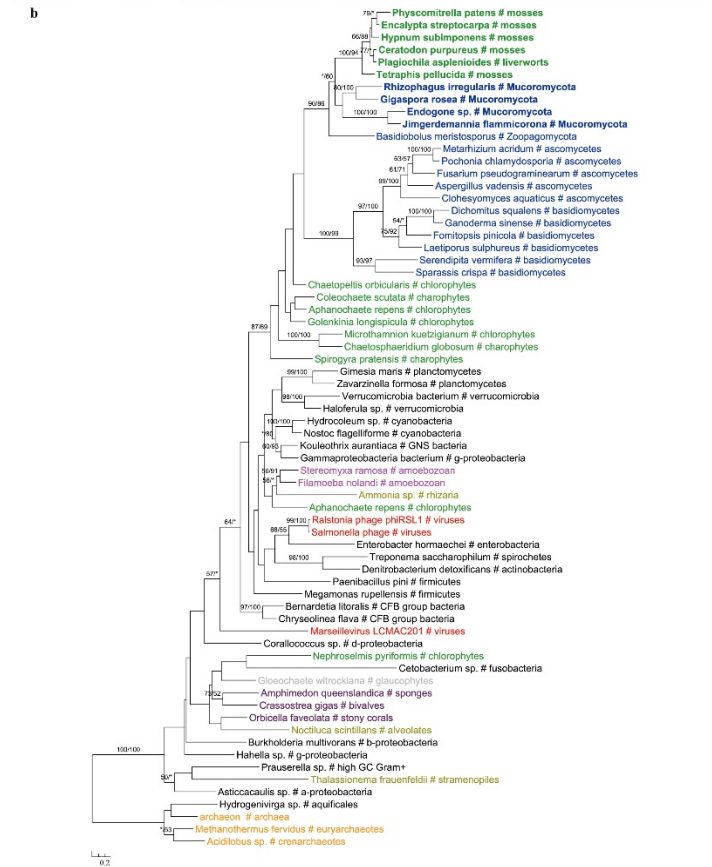

**Supplementary Fig. 5.** Relationships of PpMACRO2 and homologs, shown in multiple sequence alignment (**a**) and molecular phylogeny with green algal hits (**b**). Boxes in the alignment show amino acids uniquely shared by bryophytes and Mucoromycota fungi. Numbers above branches in the molecular phylogeny show bootstrap support values from maximum likelihood and distance analyses, respectively. Asterisks show values lower than 50%. Note again that the green algal sequences were identified from OneKP and NCBI EST datasets, but no hits could be identified from the many complete genomes of green algae in NCBI, Phytosome and other resources. Please see Supplementary Fig. 4 for gene tree without green algal sequences.

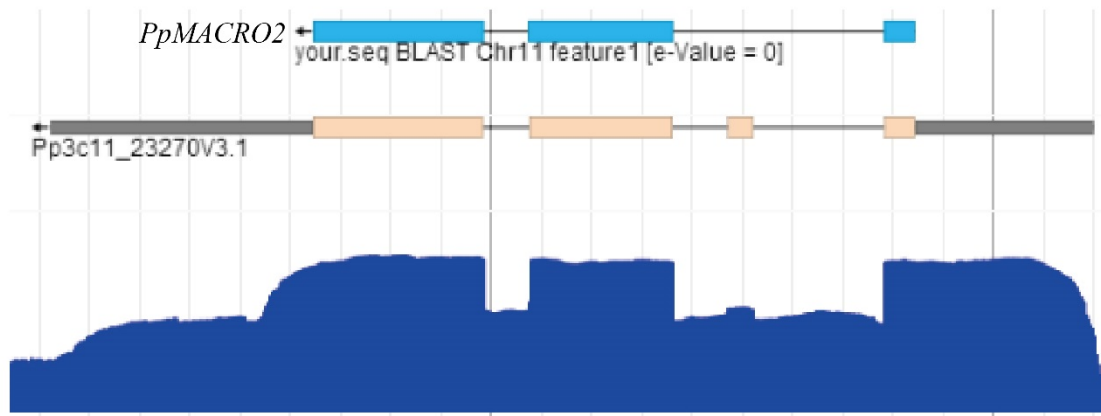

**Supplementary Fig. 6.** Coding sequence of *PpMACRO2*. Light blue boxes show the complete coding region of *PpMACRO2* that was amplified from *Physcomitrella patens* using RT-PCR. The sequencing result matched exons 1, 3 and 4 of *P. patens* genome annotation v3.3 in Phytozome (peach boxes), but exon 2 annotated by Phytozome was missing from our RT-PCR amplification.

SMART SETUP FAQ ABOUT GLOSSARY WHAT'S NEW FEEDBACK

Architecture

**Domain architecture analysis**

Display all proteins with similar:

- Domain organisation: Proteins having
- Domain composition: Proteins with the

The SMART diagram above represents a sum piece of sequence, the priority for display is give diagram are marked as 'overlap' in the right sid

**Confidently predicted**

Name Start

Selected feature details

**Macro\_2 domain**

This is a Pfam domain. Please see the [Macro\\_2](#) entry in Pfam for full annotation.

**Position:** 4 to 238

**E-value:** 1.3e-12 (HMMER3)

**Accession:** PF14519

**Description:**

**Interpro abstract (IPR028071):** This domain is an ADP-ribose binding module. It is found predominantly in yeast proteins. Some members in this domain family also contain the A1pp domain and are putative ADP-ribose-1"-monophosphatase ... (full abstract)

**Pfam domain sequence (235 aa):**

Submit to BLAST Copy to clipboard

```

CRARNSGPRFEHFLLIPVDLQRELYAAVQDEITRELPFALLDQSSTATSPISLATTNDFI
GEFLKSTQVDCIVSFARNSFGMDGGDLTISKYYGGVARELVPTVESALVDFECQQQRVGT
CVLVETKQLIGCARNCNRPFRYTAHPTBRVFKLLLPDDTATRETRALLTAVFKRNRRT
LXQQTNTGRELNTVLCGPFSTGIGRFTLRCAQWLAVIDFAENTSSNSTHE

```

**Supplementary Fig. 7.** PpMACRO2 is predicted to be functionally related to ADP-ribosylation. PpMACRO2 sequence matches the macro2 domain from the SMART database. The macro2 domain is annotated as containing an ADP-ribose binding module.



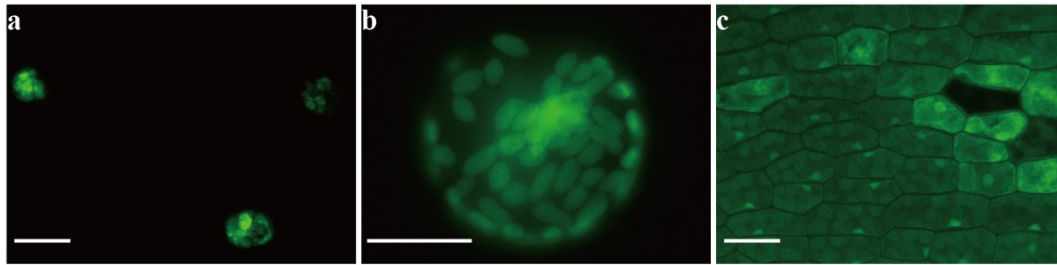

**Supplementary Fig. 8.** Subcellular localization of PpMACRO2. **a-b.** GFP signal of transient protoplast transformation. Enhanced green fluorescent protein (EGFP) was fused to *PpMACRO2* using pM999 vector for transient expression. GFP signal was observed in the nucleus and cytoplasm of protoplast. **c.** GFP signal of detached leaves. Detached leaves of *PpMACRO2*pro:*PpMACRO2*-*EGFP-GUS* lines were cultured on BCD medium for 48 hours, and GFP signal was observed in the nucleus and cytoplasm of detached leaves, indicating that PpMACRO2 is localized in both the nucleus and cytoplasm. Micrograph images shown were observed from at least three biological replicates. Scale bar: 100  $\mu\text{m}$  in **a, c**; 25  $\mu\text{m}$  in **b**.

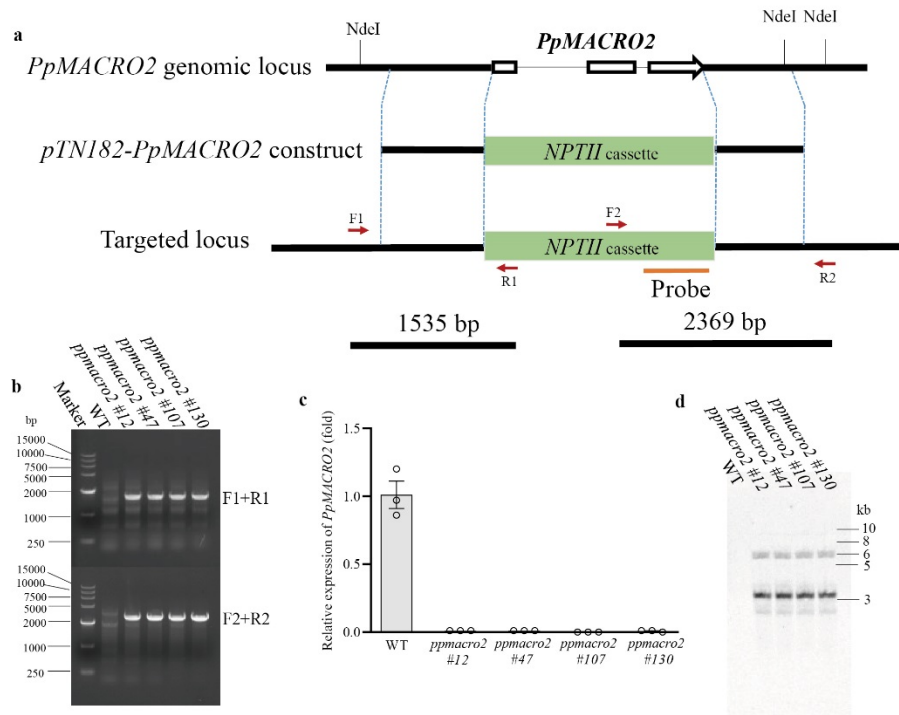

**Supplementary Fig. 9.** Generation and molecular identification of *PpMACRO2* *ko* lines. **a.** Schematic diagram of *PpMACRO2* *ko* construction and primers used for genotyping. White boxes denote the exons of *PpMACRO2*. The coding sequence of *PpMACRO2* was replaced by the *NPTII* cassette using homologous recombination. Red arrows indicate the positions of primers used for genomic PCR. Orange line indicates the position of probe used for Southern blotting analysis in *ko* plants. **b.** Results of genomic PCR for four *PpMACRO2* *ko* lines using primers shown in the schematic diagram. The fragment length of genomic PCR is in line with expectation. **c.** Quantitative RT-PCR was performed to characterize four *PpMACRO2* *ko* mutants. *PpMACRO2* transcription level was evaluated for the wild type and four *PpMACRO2* *ko* lines using qRT-PCR. No expression of *PpMACRO2* was detected in the four *ko* mutants compared to the wild type. Three biological replications were performed, and *PpEF1a* was used as reference gene for normalization. Data show means  $\pm$  s.e.m. **d.** Southern blotting analysis of *PpMACRO2* *ko* lines. Genomic DNA of WT and *ko* (#12, #47, #107 and #130) lines was digested with NdeI, and DIG-labeled fragment containing the *NPTII* gene was used as the probe. The result of Southern blotting indicates that *ko* lines resulted from single integration (~ 6 kb).

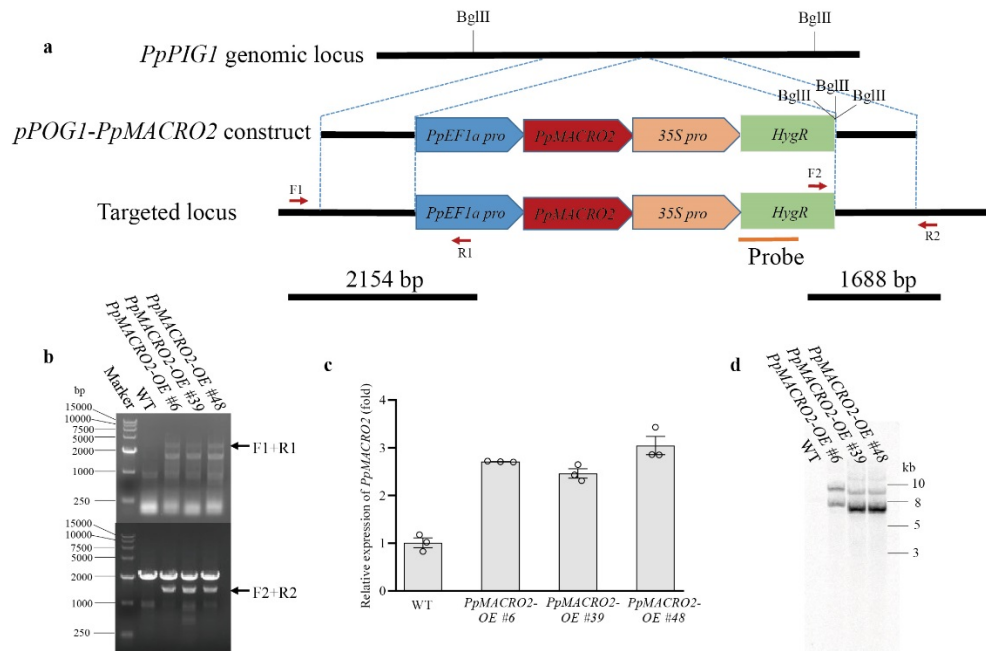

**Supplementary Fig. 10.** Generation and molecular identification of *PpMACRO2* OE lines. **a.** Schematic diagram of *PpMACRO2* OE construction and primers used for genotyping. Promoter *PpEF1a* was used for enhancing *PpMACRO2* expression in *PpPIG1* genomic locus, and hygromycin was used as selection marker and driven by 35S promoter. Red arrows indicate the positions of primers used for genomic PCR. Orange line indicates the position of probe used for Southern blotting analysis in OE plants. **b.** Genomic PCR confirmation of three *PpMACRO2* OE lines using primers shown in the schematic diagram. The fragment length of genomic PCR is in accordance with expectation. **c.** Quantitative RT-PCR was used to characterize three *PpMACRO2* OE lines. *PpMACRO2* transcription level was evaluated for the wild type and three *PpMACRO2* OE lines using qRT-PCR. The expression level of *PpMACRO2* is over two-fold higher in *PpMACRO2* OE lines than in the wild type. Three biological replications were performed and *PpEF1a* was used as reference gene for normalization. Data show means  $\pm$  s.e.m. **d.** Southern blotting analysis of *PpMACRO2* OE lines. Genomic DNA of WT and OE (#6, #39 and #48) lines was digested with BglIII, and DIG-labeled fragment containing the *HygR* gene was used as the probe. The result of Southern blotting indicates that OE lines resulted from single integration (~ 8 kb in #6, ~ 7.3 kb in #39 and #48).

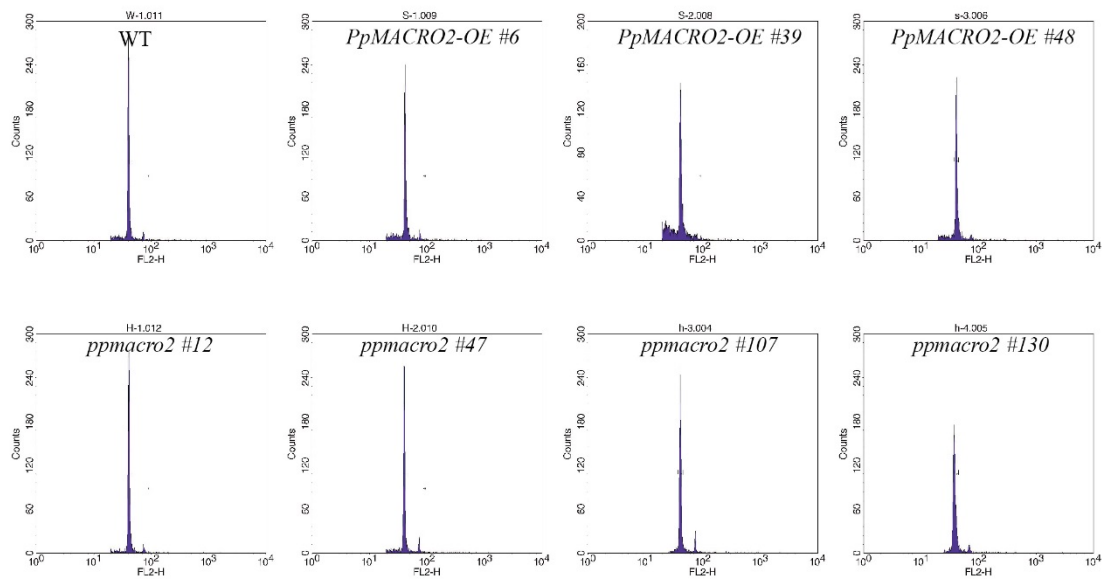

**Supplementary Fig. 11.** Chromosome ploidy analyses. WT, *ko* and *OE* plants were grown for one week on BCDAT medium, and their chromosome ploidy levels were determined using flow cytometry. The results indicate that chromosome ploidy levels of *ko* and *OE* plants are consistent with WT plants.

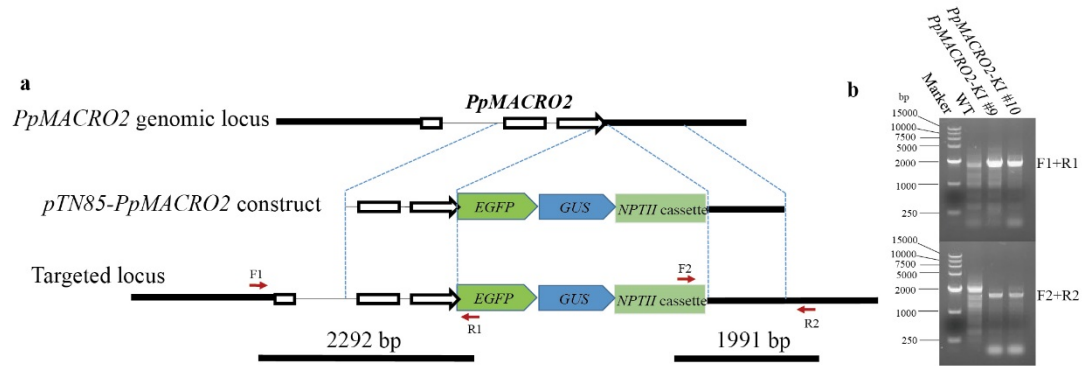

**Supplementary Fig. 12.** Schematic and genotyping for *PpMACRO2* knockin double tag lines. **a.** Construction of *PpMACRO2* knockin double tag lines. White boxes denote the exons of *PpMACRO2*, and red arrows indicate the positions of primers used for genomic PCR. **b.** Genomic PCR for *PpMACRO2* knockin double tag lines. The fragment length of genomic PCR is consistent with expectation as shown in the schematic.

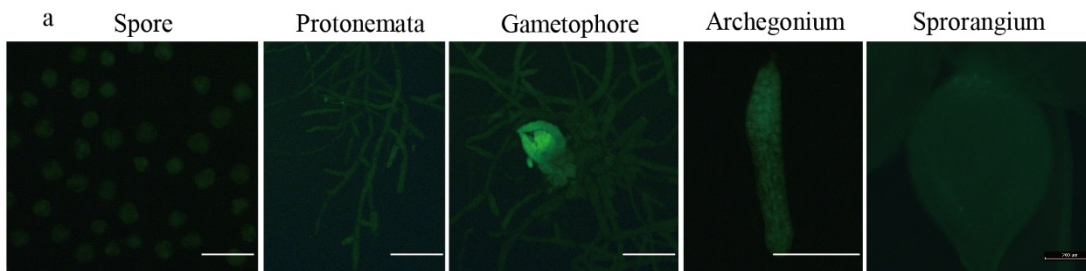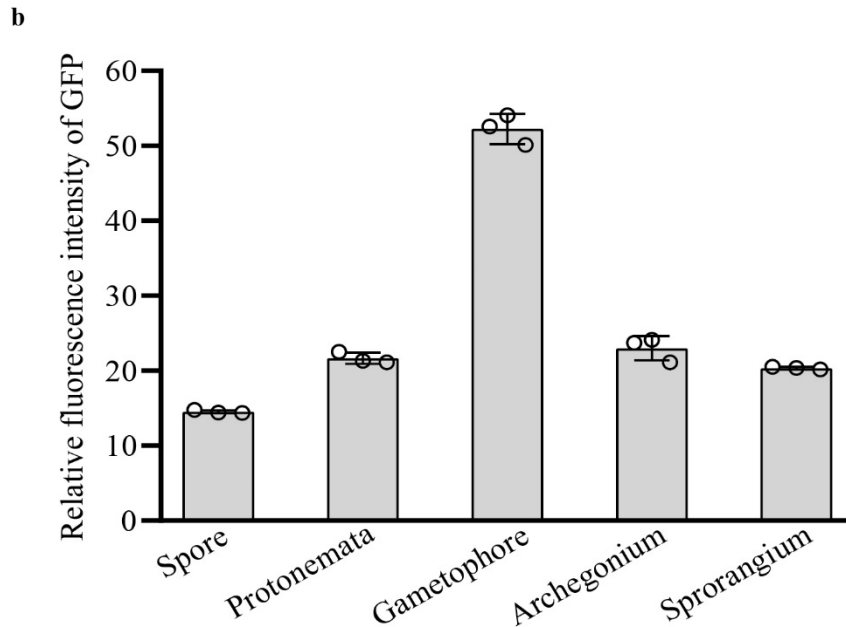

**Supplementary Fig. 13.** GFP signal in the life cycle of *P. patens*. **a.** Fluorescent signal was observed in spores, protonemata, gametophores, archegonia, and sporangia. **b.** Quantification of GFP fluorescence intensity. ImageJ was used for analyzing the relative intensity of GFP signal (in panel **a**). Micrograph images provided were observed from three biological replicates. Data show means  $\pm$  s.e.m. of three biological replications. Scale bars: 200  $\mu$ m.

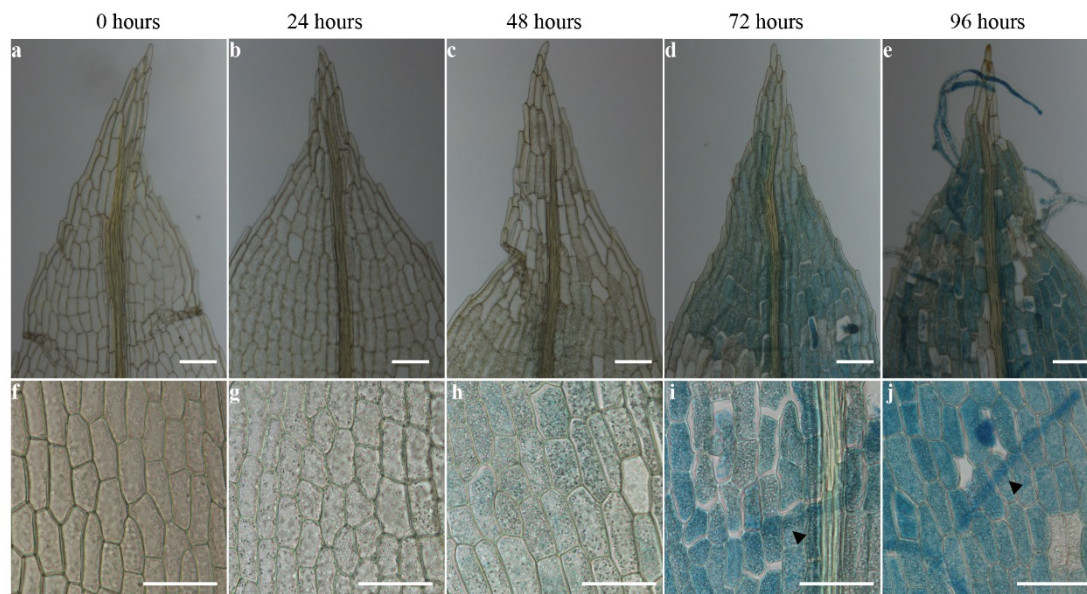

**Supplementary Fig. 14.** *PpMACRO2* expression was induced during tissue regeneration in detached leaves. GUS staining was examined after detached leaves were incubated on BCD medium for 24, 48, 72, and 96 hours, respectively. **a-e.** GUS staining of gametophore leaves. **f-j.** Local magnification for corresponding leaves. Arrowheads denote differentiated protonema in **i** and **j**. Micrograph images given were observed from ten biological replicates. Scale bar: 200  $\mu\text{m}$ .

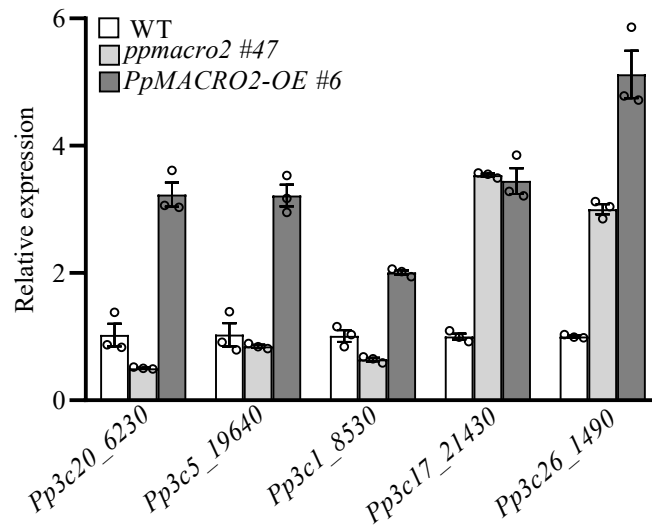

**Supplementary Fig. 15.** Expression level of *Pp3c20\_6230*, *Pp3c5\_19640*, *Pp3c1\_8530*, *Pp3c17\_21430* and *Pp3c26\_1490* in WT, *ko* and *OE* plants. *Pp3c20\_6230* encodes Sin-associated protein 30 (SAP30) that regulates histone deacetylation. The product of *Pp3c5\_19640* is a homolog of methyl-CpG binding domain-containing protein 9 (MBD9) that modulates development by modifying chromatin structure. *Pp3c1\_8530* encodes a SET domain protein that regulates histone methylation. The product of *Pp3c17\_21430* is a basic-leucine zipper (bZIP) transcription factor that is involved in DNA binding. The expressed protein of *Pp3c26\_1490* is related to Dof domain, including a zinc finger DNA-binding domain. Transcript abundance of these genes was confirmed through qRT-PCR with three independent biological replicates, normalized to *PpEF1a*. Data show means  $\pm$  s.e.m.



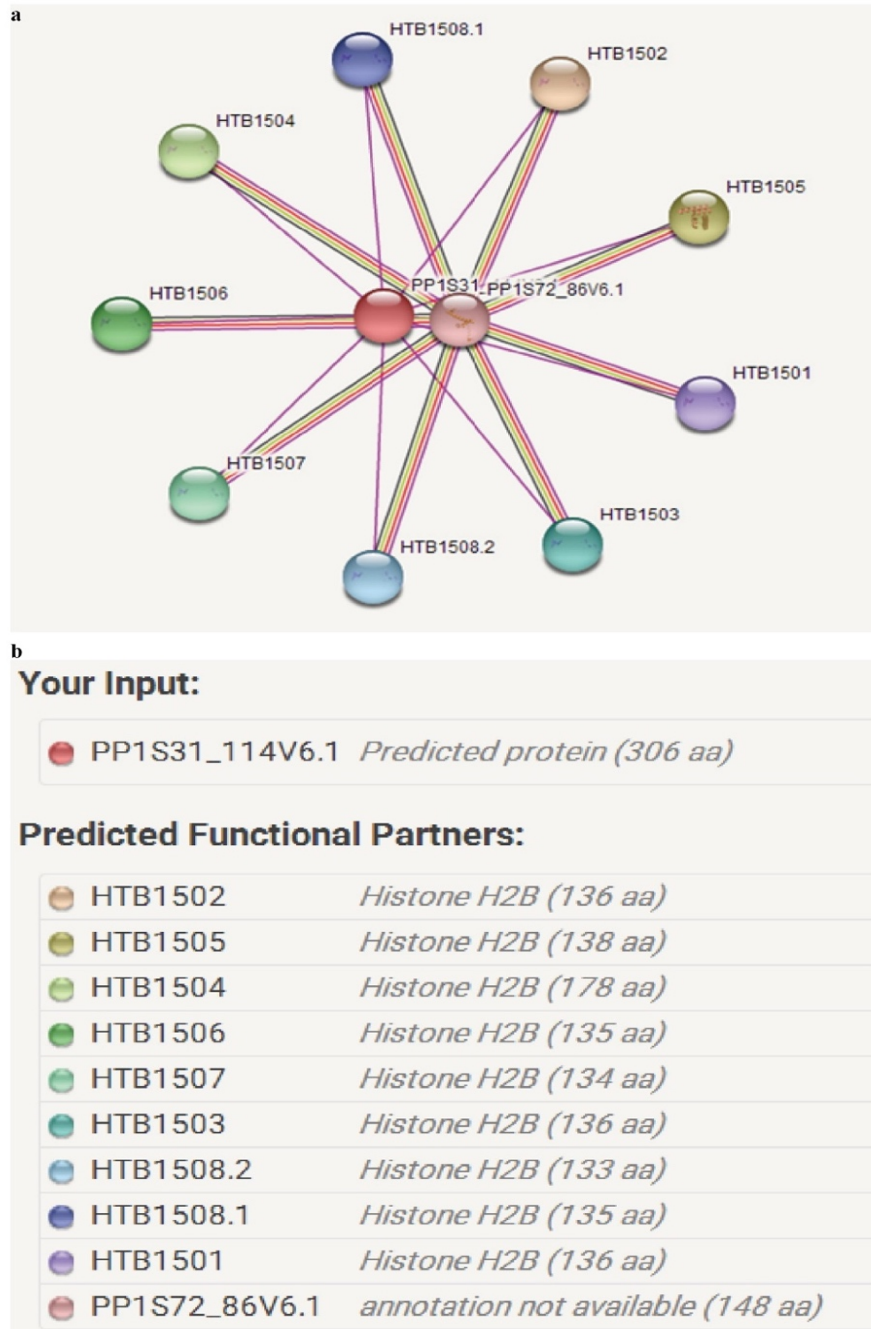

**Supplementary Fig. 16.** The interaction proteins of PpMACRO2. PpMACRO2 is predicted to interact with histones H2A and H2B according to the STRING database. PP1S31\_114V6.1 indicates PpMACRO2, PP1S72\_86V6.1 represents histones H2A, and other HTBs refer to histones H2B.

**Supplementary Table 1.** Primers used for genomic PCR of *PpMACRO2* homologous sequences and ITS2 in *Spirogyra sp.*

| <b>Primer</b>       | <b>Sequence (5'-3')</b> |
|---------------------|-------------------------|
| S. pratensis-F      | CATCCCAAAGTCGAGCTCGTT   |
| S. pratensis-R1     | ACATGCATTATTAGGGTGGG    |
| S. pratensis-R2     | GCCATTAATCTTGCAGCATC    |
| PpMACRO2 Homolog-F1 | CGTTTGGACTCATGGATGGG    |
| PpMACRO2 Homolog-R1 | GCGAACTGCAGCCAACAT      |
| PpMACRO2 Homolog-F2 | ATGTTGGCTGCAGTTCGC      |
| PpMACRO2 Homolog-R2 | ATGCTTAAATGCAAGCGCCAT   |
| PpMACRO2 Homolog-F3 | TTTGACTGCATCGTGAGCCC    |
| PpMACRO2 Homolog-R3 | TTGAAATGGCCAAATCAATGCC  |
| ITS2-F              | TGCACTCTGCGCAAGCGGAGTAT |
| ITS2-R              | GGCCTTGTCTGATCTGAGGTC   |

**Supplementary Table 2.** Genes related to cell wall formation and cell division are often down-regulated in *ko* and *OE* plants. Data were generated from RNA-seq data and verified through qRT-PCR.

| Gene ID      | <i>ppmacro2</i> #47 |       |       | <i>PpMACRO2-OE</i> #6 |       |       | Gene description                                                                                |
|--------------|---------------------|-------|-------|-----------------------|-------|-------|-------------------------------------------------------------------------------------------------|
| Pp3c9_3880   | -2.53               | -5.48 | -1.52 | -1.09                 | -1.02 | -0.51 | PF06955:Xyloglucan endo-transglycosylase (XET) C-terminus PF00722:Glycosyl hydrolases family 16 |
| Pp3c24_13310 | -1.64               | -2.12 | -0.12 | -0.47                 | -0.51 | -0.10 | PF00722:Glycosyl hydrolases family 16 PF06955:Xyloglucan endo-transglycosylase (XET) C-terminus |
| Pp3c6_480    | -1.96               | -6.86 | -2.14 | -1.82                 | -1.68 | -1.06 | PF06955:Xyloglucan endo-transglycosylase (XET) C-terminus PF00722:Glycosyl hydrolases family 16 |
| Pp3c26_9030  | -2.71               | -3.07 | -2.00 | -1.43                 | -1.12 | -0.82 | PF14543:Xylanase inhibitor N-terminal PF14541:Xylanase inhibitor C-terminal                     |
| Pp3c5_23400  | -2.86               | -3.49 | -2.01 | -1.29                 | -1.05 | -0.89 | PF01095:Pectinesterase                                                                          |
| Pp3c25_6620  | -3.34               | -2.48 | -1.94 | -1.42                 | -1.32 | -0.83 | PF03016:Exostosin family                                                                        |
| Pp3c13_12000 | -5.07               | -5.21 | -1.92 | -3.13                 | 1.14  | 0.04  | PF00150:Cellulase (glycosyl hydrolase family 5)                                                 |
| Pp3c8_9790   | -4.87               | -7.45 | -7.50 | -3.32                 | -6.54 | -3.39 | Encodes a tetratricopeptide repeat protein required for cell cycle exit after meiosis II.       |
| Pp3c24_8590  | -0.56               | -0.50 | 0.27  | 0.41                  | 0.13  | -0.17 | PF12214:Cell cycle regulated microtubule associated protein                                     |
| Pp3c24_19380 | -0.60               | -0.72 | -0.70 | -0.77                 | -0.75 | -1.37 | PF00307:Caiponin homology (CH) domain PF16796:Microtubule binding PF00225:Kinesin motor domain  |
| Pp3c6_7500   | -0.92               | -1.04 | -1.15 | -0.61                 | -0.75 | -1.09 | PF03953:Tubulin C-terminal domain PF00091:Tubulin/FtsZ family, GTPase domain                    |
| Pp3c7_15580  | -1.75               | -2.02 | -0.31 | -1.61                 | -1.59 | -1.22 | PF03999:Microtubule associated protein (MAP65/ASE1 family)                                      |
| Pp3c21_8330  | -3.26               | -1.39 | -3.43 | 1.08                  | -0.12 | -1.26 | PTHR22844/PTHR22844:SF125 - F-box and WD40 domain protein                                       |
| Pp3c9_7690   | -1.98               | -2.85 | -1.94 | -0.35                 | -0.14 | 0.00  | PF00646/PF01344 - F-box domain (F-box) // Kelch motif (Kelch_1)                                 |

**Supplementary Table 3.** Additional gene information for Fig. 6 of the main text. Gene identifiers are from Phytozome. These genes are related to epigenetic modification and developmental transcription factors.

| Gene ID      | Gene description                                                                                                     |
|--------------|----------------------------------------------------------------------------------------------------------------------|
| Pp3c20_13850 | PF08241:Methyltransferase domain                                                                                     |
| Pp3c3_26550  | PF00850:Histone deacetylase domain                                                                                   |
| Pp3c17_14770 | PF00856:SET domain protein  TPR repeat-containing protein                                                            |
| Pp3c13_4470  | PF00856:SET domain protein  Histone-lysine N-methyltransferase                                                       |
| Pp3c13_19810 | PF00856:SET domain protein  Histone-lysine N-methyltransferase ATX4-related                                          |
| Pp3c7_2300   | PF00847:AP2 domain  Any process that modulates the frequency, rate or extent of cellular DNA-templated transcription |
| Pp3c10_20000 | PF00847:AP2 domain  Ethylene-responsive transcription factor 15-related                                              |
| Pp3c7_10780  | PF00847:AP2 domain  Any process that modulates the frequency, rate or extent of cellular DNA-templated transcription |
| Pp3c4_2530   | PF00847:AP2 domain  Any process that modulates the frequency, rate or extent of cellular DNA-templated transcription |
| Pp3c3_6830   | PF00847:AP2 domain  Any process that modulates the frequency, rate or extent of cellular DNA-templated transcription |
| Pp3c14_3280  | PF00847:AP2 domain  Ethylene-responsive transcription factor CRF1-related                                            |
| Pp3c3_6420   | PF00847:AP2 domain  Any process that modulates the frequency, rate or extent of cellular DNA-templated transcription |
| Pp3c22_20520 | PF00847:AP2 domain  Any process that modulates the frequency, rate or extent of cellular DNA-templated transcription |
| Pp3c1_14230  | PF00847:AP2 domain  Any process that modulates the frequency, rate or extent of cellular DNA-templated transcription |
| Pp3c8_7340   | PF00847:AP2 domain  Any process that modulates the frequency, rate or extent of cellular DNA-templated transcription |
| Pp3c1_5010   | PF00847:AP2 domain  Any process that modulates the frequency, rate or extent of cellular DNA-templated transcription |
| Pp3c11_10660 | PF00847:AP2 domain  Any process that modulates the frequency, rate or extent of cellular DNA-templated transcription |
| Pp3c15_3620  | PF00847:AP2 domain  Any process that modulates the frequency, rate or extent of cellular DNA-templated transcription |
| Pp3c17_18130 | PF0046:Homeobox domain  Homeobox associated leucine zipper                                                           |
| Pp3c6_2730   | PF0046:Homeobox domain  Transcription factor HEX, contains HOX and HALZ domains                                      |
| Pp3c1_24020  | PF0046:Homeobox domain  Homeobox-leucine zipper protein HDG2                                                         |
| Pp3c12_21760 | PF0046:Homeobox domain  Homeobox associated leucine zipper                                                           |
| Pp3c15_13310 | PF0046:Homeobox domain SF290                                                                                         |
| Pp3c3_37710  | PF0046:Homeobox domain  Transcription factor PHOX2/ARIX, contains HOX domain                                         |

**Supplementary Table 4.** Primers used for vector construction of transient expression, *KI*, *ko* and *OE* of *PpMACRO2*.

| Primer                         | Sequence (5'-3')                           |
|--------------------------------|--------------------------------------------|
| pM999-PpMACRO2-F(EcoRI)        | TCCTGAAACTCCCTCGAATTCATGAAGTTGAATGTCGTGC   |
| pM999-PpMACRO2-R(SacI)         | ATCTCCTTGGGCATCGAGCTCCTTCCCGAGGACCTCGAA    |
| pTN85-PpMACRO2-KI-5F(KpnI)     | GAACAAAAGCTGGGTACCTTTCCAGAACCCTTCGTAGAGT   |
| pTN85-PpMACRO2-KI-5R(XhoI)     | GCTCACGTCGACCTCGAGGACCTCGAAAGTACACGGAGA    |
| pTN85-PpMACRO2-KI-3F(BmaHI)    | CGGGGATCGGGGGGATCCTCCTGGACATTTGATTCACTGG   |
| pTN85-PpMACRO2-KI-3R(XbaI)     | GGTGGCGGCCGCTCTAGAAAAGGGGAGAGCACTTCTACTATC |
| pTN182-PpMACRO2-ko-5F(SalI)    | CCCCCCTCGAGGTCGAC AACTTGCAATGACGACGAG      |
| pTN182-PpMACRO2-ko-5R(HindIII) | GAATTCGATATCAAGCTT ACAGCCAATTGAACAAACTCC   |
| pTN182-PpMACRO2-ko-3F(SmaI)    | GGGATCGCATGCCCGGGGCTCGGTCAGGTTAATTTCTG     |
| pTN182-PpMACRO2-ko-3R(BmaHI)   | CGGCCGCTCTAGGATCC AGTTCCAATTTTGAAAGCTGG    |
| pPOG1-PpMACRO2-OE-F(NotI)      | TCCAGTCACTATGGCGGCCGCATGAAGTTGAATGTCGTGC   |
| pPOG1-PpMACRO2-OE-R(SalI)      | TATCCAGTCACTATGGTTCGACCTTCCCGAGGACCTCGAA   |

**Supplementary Table 5.** Primers used for genotyping of *KI*, *ko* and *OE* plants of *PpMACRO2*.

| <b>Primer</b>  | <b>Sequence (5'-3')</b> |
|----------------|-------------------------|
| PpMACRO2-KI-F1 | CGCACTGGAGTATCTCGTTC    |
| PpMACRO2-KI-R1 | ATGCCGTTCTTCTGCTTGTC    |
| PpMACRO2-KI-F2 | ACGAGACGACTAAACCTGGA    |
| PpMACRO2-KI-R2 | TGAGAGATTACGGGAGCACT    |
| PpMACRO2-ko-F1 | GTGGCAAGAGAGAAGGCTAA    |
| PpMACRO2-ko-R1 | TGTCTGTTGTGCCAGTCAT     |
| PpMACRO2-ko-F2 | CTTGGGTGGAGAGGCTATTC    |
| PpMACRO2-ko-R2 | GAAGGTTGAGAGATTACGGG    |
| PpMACRO2-OE-F1 | CTCCTCCAAGCATCCACCCTA   |
| PpMACRO2-OE-R1 | CTGTCATGTCCCCTCGATAT    |
| PpMACRO2-OE-F2 | CCTATACCCCTAATAACCCC    |
| PpMACRO2-OE-R2 | CTTCACTCATCCACATCCAA    |

**Supplementary Table 6.** Primers used for qRT-PCR of *PpMACRO2* and genes related to epigenetic modification, AP2 domain and homeobox.

| <b>Gene ID</b> | <b>Primer-F (5'-3')</b> | <b>Primer-R (5'-3')</b> |
|----------------|-------------------------|-------------------------|
| PpMACRO2       | TCAAGAGGAATTAGTGGCAGC   | AGTCGCTATTGAGATGGGCG    |
| Pp3c20_13850   | CTTGACGACCTCAAGCAGT     | AGAGGCTCGCAACCATTCAA    |
| Pp3c3_26550    | CCTAATGTAAGCCTCGCGGT    | CTGCTGGAATGGTGGTGGAT    |
| Pp3c17_14770   | GTACGGAAGCAGTTGAGCCT    | GGTTGCCCTAGCACTCTCAGG   |
| Pp3c1_8530     | CAGCAAGGAAGTCAGGAGGG    | GCGACAGGATAAGATGCGGA    |
| Pp3c13_4470    | GATCTCCGGGTGGAAATGGA    | ACTGATGCTGTCTTGACCT     |
| Pp3c13_19810   | CTCTTGCGAACCATTCGGAT    | TAATCCCTTCTTCTGCCGCC    |
| Pp3c17_21430   | CCGAGATGGATGGTGTAGCTC   | ACGCAATTGGGCAGTCAAAA    |
| Pp3c26_1490    | TTGTCATCGAGAGTGCCACC    | GCGCCGTTGAAGTAACCAAG    |
| Pp3c3_6830     | GTGAATGCAATGGTGGCGAG    | TGGGGACTGCAACATTCACA    |
| Pp3c7_2300     | TGCCCAGTTCCGTGAATCAA    | TCCTGATCGAACCTGTCT      |
| Pp3c10_20000   | TAGACCAACCACAAGGCCAC    | AGGTCTGCGATTTCCACGAG    |
| Pp3c7_10780    | TGGCTTGTGATACGCAGGTG    | ATTTTTCGTGTGGGACGGCA    |
| Pp3c3_6420     | TCAGCTAGCAGTTTCAGCCC    | AGATGCATCGACCTGGAACC    |
| Pp3c4_2530     | AAAGATCCCAGCACACGTT     | GGTCTGCGGTAGAGGATTCC    |
| Pp3c14_3280    | ACTTCATGATGGACTGGGCG    | TCCCCAAAAACTCCAACCC     |
| Pp3c1_14230    | ACTCACTACCATGTCGTGC     | TGTCTTGAATGTCCCAGCC     |
| Pp3c22_20520   | CAGGGGTTGCTTCTACCGAG    | TCCTCTCCCCTTCTGACTG     |
| Pp3c8_7340     | AAACTCTGGTACTTCGGCGG    | CCAGGCCAATCCCACATCTT    |
| Pp3c12_21760   | CCCGAACCAACCGATAGTAGC   | TTCACGGTGACGTCGTGTAG    |
| Pp3c6_2730     | CAATGTCACGCTTGTGCGAA    | GGTCACTGCATCCTCTAGGC    |
| Pp3c17_18130   | CAAGGATCACCACCACACGA    | CCTGAGCTTGTGACGTCTT     |
| Pp3c1_24020    | CGGAGGAGGAGGAGCAAAG     | TGAGGAACGCTCAAGACCAC    |
| Pp3c3_37710    | TTCGTTTGC GGCAATGATCG   | CTGTCCACCTCCTTGCGATT    |
| Pp3c15_13310   | TGAGCTTGC GGAGAACAAGA   | TGGGCTTGTGTACGCTCAAA    |

**Supplementary Table 7.** Primers used for probe amplification to detect single integration in *ko* and *OE* lines.

| <b>Primer</b>       | <b>Sequence (5'-3')</b> |
|---------------------|-------------------------|
| PpMACRO2-ko-probe-F | GCCGAGAAAGTATCCATCAT    |
| PpMACRO2-ko-probe-R | TCAGAAGAACTCGTCAAGAA    |
| PpMACRO2-OE-probe-F | AGGGCGAAGAATCTCGTGCT    |
| PpMACRO2-OE-probe-R | TTGGCGACCTCGTATTGGGA    |
